# Supplementary material for: Cell Adhesion, Morphology, and Metabolism Variation via Acoustic Exposure within Microfluidic Cell Handling Systems
Source: PubMed Central journal article supplement (PMC6918100; doi:10.1002/advs.201902326), 2019-10-30
Supplement: ADVS-6-1902326-s001.pdf [file ADVS-6-1902326-s001.pdf]

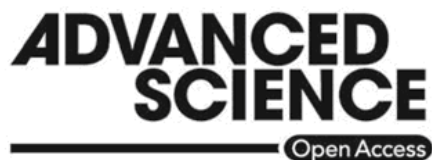

## Supporting Information

for *Adv. Sci.*, DOI: 10.1002/adv.201902326

Cell Adhesion, Morphology, and Metabolism Variation via  
Acoustic Exposure within Microfluidic Cell Handling Systems

*Citsabehsan Devendran, James Carthew, Jessica E. Frith, and  
Adrian Neild\**

## Supporting Information

**Cell Adhesion, Morphology and Metabolism Variation via Acoustic Exposure within Microfluidic Cell Handling Systems***Citsabehsan Devendran, James Carthew, Jessica E. Frith and Adrian Neild\**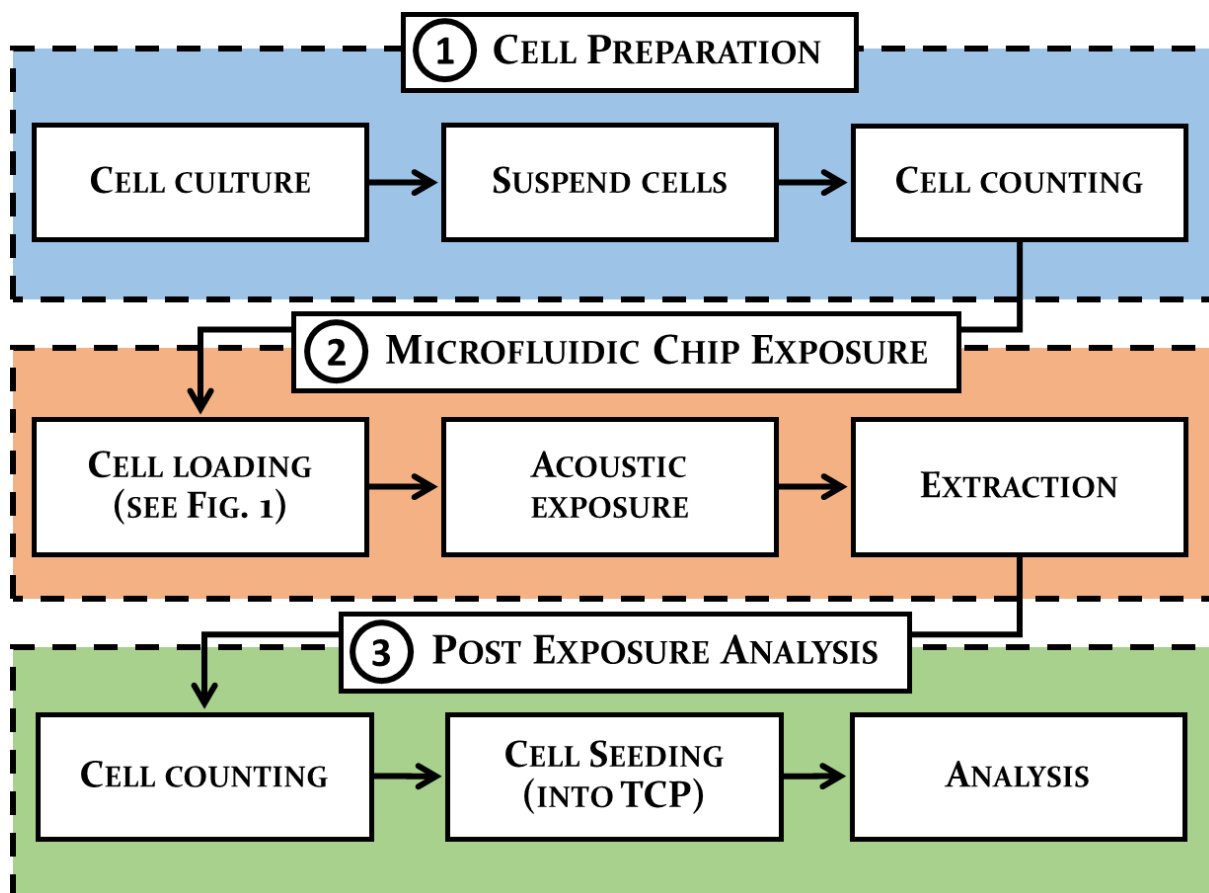

**Figure S 1.** The process flow diagram depicting the preparation of cells, exposure to varying acoustic conditions and subsequent analysis methods.

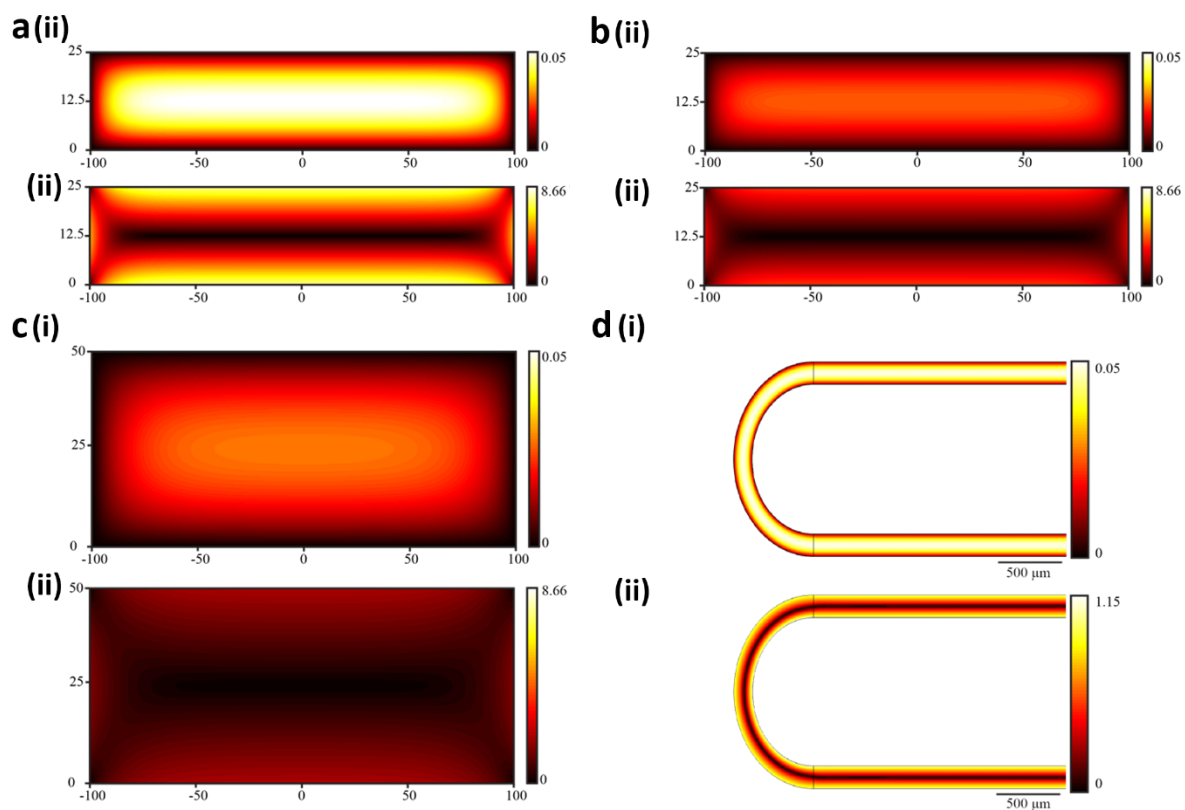

**Figure S 2.** Flow velocity (i) and shear profiles (ii) in the cross section view of the channel 25  $\mu\text{m}$  deep channel at  $10 \mu\text{L min}^{-1}$  (a), 25  $\mu\text{m}$  deep channel at  $5 \mu\text{L min}^{-1}$  (b) and 50  $\mu\text{m}$  deep channel at  $10 \mu\text{L min}^{-1}$  (c). The top view (d) of the flow velocity (i) and shear (ii) profile at the channel bend for a 25  $\mu\text{m}$  deep channel at  $10 \mu\text{L min}^{-1}$  scenario.

MSC

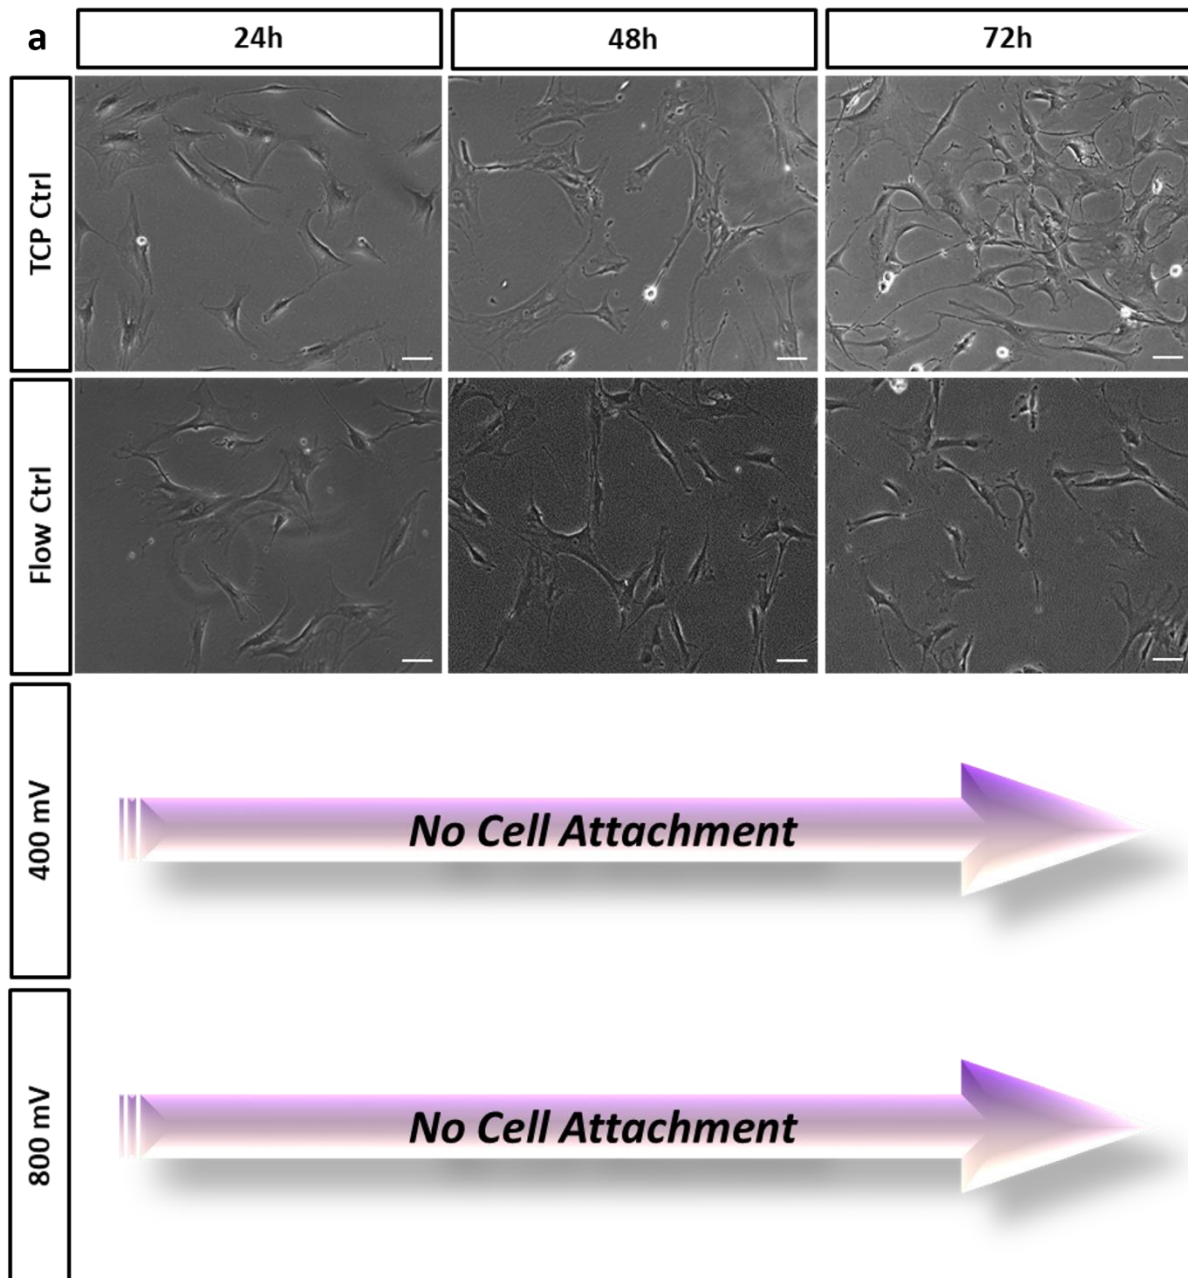

**MG63**

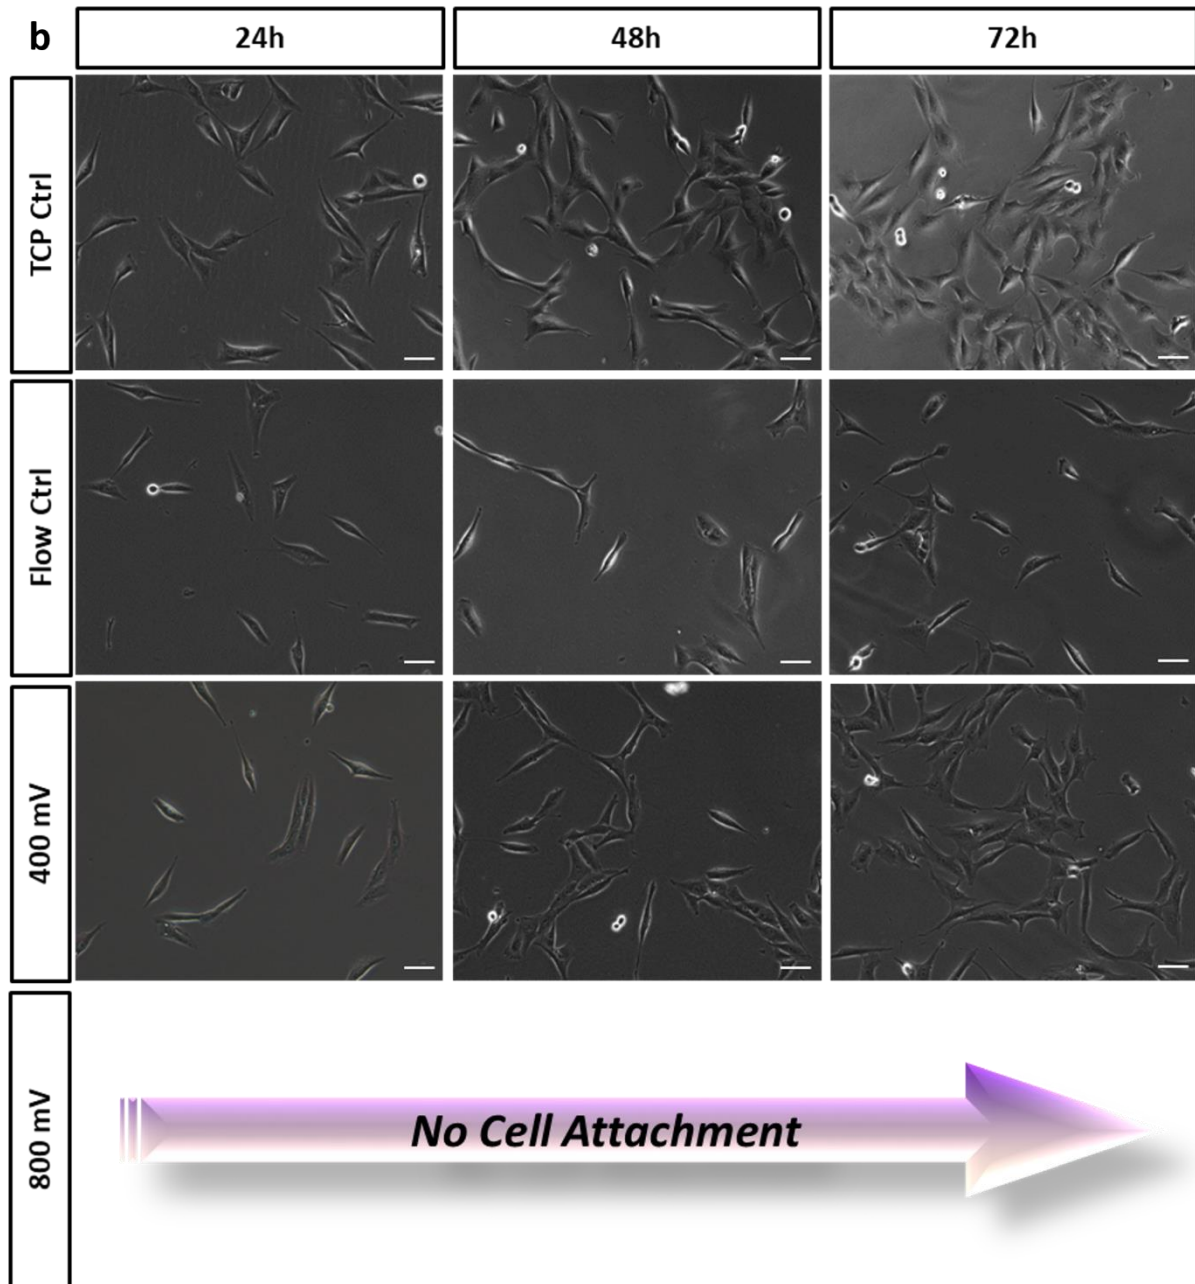

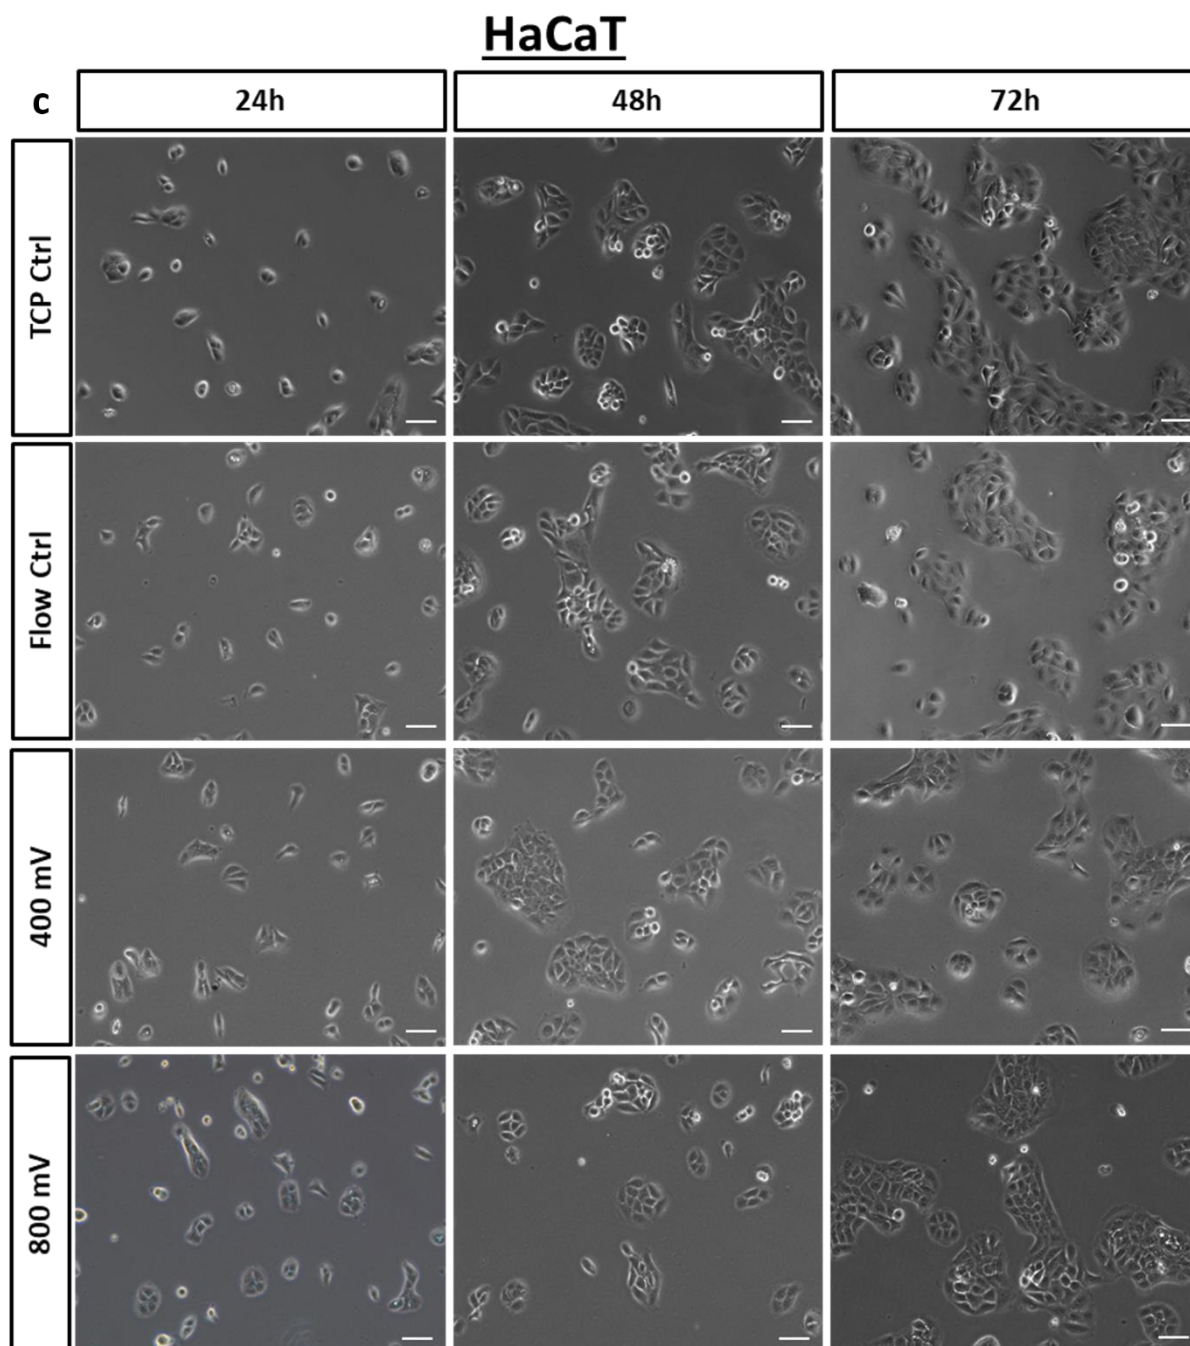

**Figure S 3.** Acoustic exposure resulted in no observed changes in cell attachment phenotypes. Phase contrast images for MSC, MG63 and HaCaT cells across 24 h, 48 h and 72 h post-exposure. Labels of no cell attachment denote scenarios in which cells could not adhere to the growth substrate post-exposure and thus could not be assessed. Scale bar, 50  $\mu\text{m}$ .

**Table S 1.** Quantification of 24 h live cell percentage calculated from live/dead fluorescence staining, with data presented as mean  $\pm$  SD from triplicate samples passed through the  $10 \mu\text{L min}^{-1}$ ;  $25 \mu\text{m}$  high channel.

|           | MSC [%]      | MG63 [%]     | L929 [%]     | HaCaT [%]    |
|-----------|--------------|--------------|--------------|--------------|
| TCP Ctrl  | 96.9 $\pm$ 2 | 97.0 $\pm$ 4 | 96.5 $\pm$ 3 | 95.7 $\pm$ 2 |
| Flow Ctrl | 93.6 $\pm$ 3 | 97.7 $\pm$ 2 | 97.3 $\pm$ 2 | 96.9 $\pm$ 1 |
| 400 mV    | -            | 96.3 $\pm$ 3 | 97.6 $\pm$ 2 | 96.7 $\pm$ 2 |
| 800 mV    | -            | -            | 96.3 $\pm$ 3 | 93.7 $\pm$ 4 |

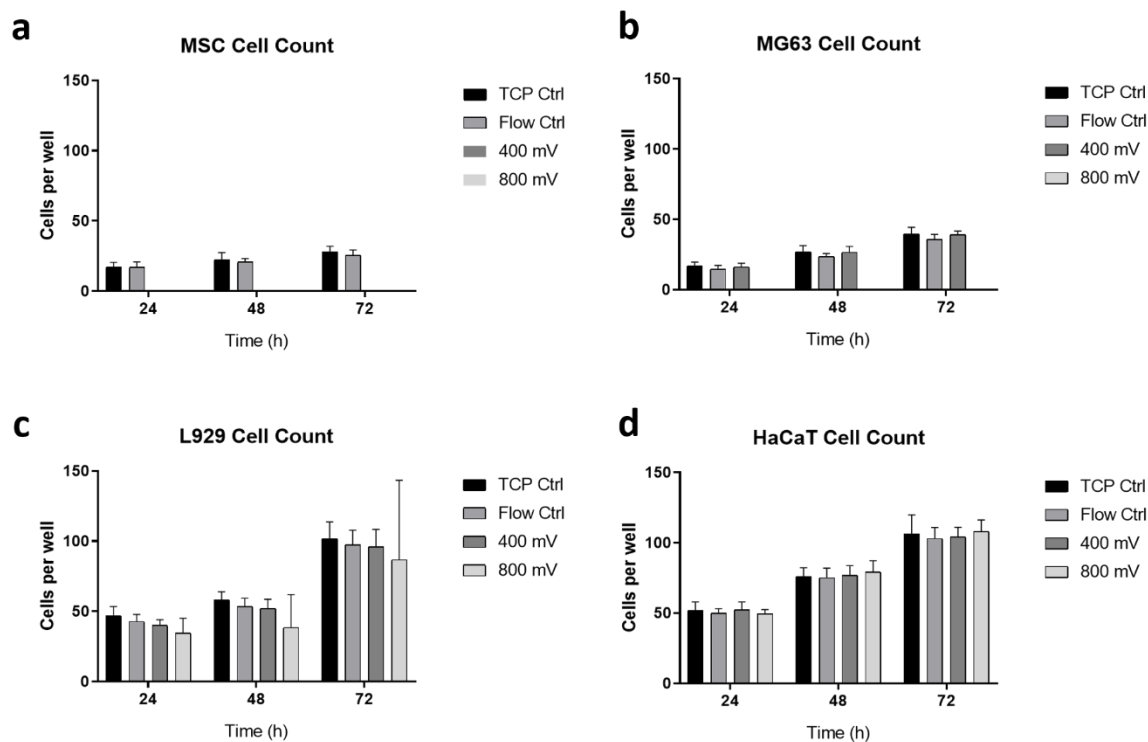

**Figure S 4.** Cell count data at three time points for MSCs (a), MG63 (b), L929 (c) and HaCaT (d).

**Table S 2.** Quantification of 24 h live cell percentage calculated from live/dead fluorescence staining, with data presented as mean  $\pm$  SD from triplicate samples passed through the 10  $\mu\text{L min}^{-1}$ ; 50  $\mu\text{m}$  high channel.

|           | MSC [%]      | MG63 [%]     |
|-----------|--------------|--------------|
| TCP Ctrl  | 97.1 $\pm$ 4 | 97.7 $\pm$ 2 |
| Flow Ctrl | 95.9 $\pm$ 3 | 96.4 $\pm$ 4 |
| 400 mV    | 95.3 $\pm$ 5 | 97.3 $\pm$ 3 |
| 800 mV    | 7.03 $\pm$ 6 | 95.6 $\pm$ 5 |

**Table S 3.** Quantification of 24 h live cell percentage calculated from live/dead fluorescence staining, with data presented as mean  $\pm$  SD from triplicate samples passed through the 5  $\mu\text{L min}^{-1}$ ; 25  $\mu\text{m}$  high channel.

|           | L929 [%]     | HaCaT [%]    |
|-----------|--------------|--------------|
| TCP Ctrl  | 97.7 $\pm$ 3 | 95.7 $\pm$ 4 |
| Flow Ctrl | 96.7 $\pm$ 3 | 95.3 $\pm$ 2 |
| 400 mV    | 96.2 $\pm$ 4 | 93.7 $\pm$ 3 |
| 800 mV    | -            | 94.2 $\pm$ 4 |



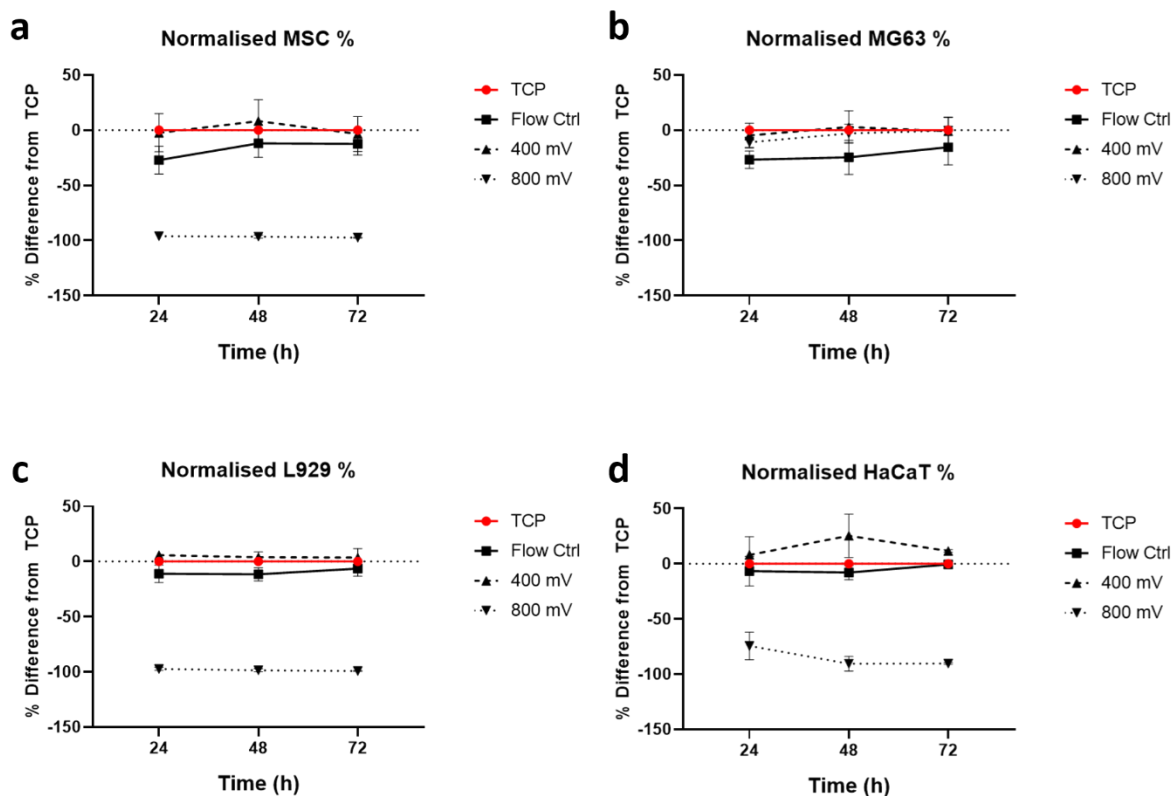

**Figure S 5.** Percentage difference in cell metabolic activity normalised to TCP for MSC (a), MG63 (b) based on results reported in Figure 6a and b (at  $10 \mu\text{L min}^{-1}$  in a  $50 \mu\text{m}$  channel height) and for L929 (c) and HaCaT (d) based on results reported in Figure 6c and d (at  $5 \mu\text{L min}^{-1}$  in a  $25 \mu\text{m}$  channel height).

**Table S 4.** Normalised range of metabolic activity highlighting the decreasing trend in range as cell stiffness increases (as shown in Figure 8a) based on results reported in (Figure S5) at a 400 mV acoustic exposure at 72 h.

|              | MSC [%] | MG63 [%] | L929 [%] | HaCaT [%] |
|--------------|---------|----------|----------|-----------|
| <b>Min</b>   | -18.18  | -15.45   | -1.49    | 10.19     |
| <b>Max</b>   | 13.37   | 7.13     | 13.04    | 12.50     |
| <b>Range</b> | 31.55   | 22.57    | 14.53    | 2.31      |
